# Supplementary material
Source: PubMed Central journal article supplement (PMC3299887)
Supplement: NIHMS346218-supplement-01.pdf [file NIHMS346218-supplement-01.pdf]

**Supplemental Table 1. Laboratory experiments that have evaluated the effects of dietary restriction protocols on the survival of rats.** The table lists 53 experiments involving a group of DR-fed rats paired with a reference group of rats maintained on a control diet (e.g., *ad lib* feeding). Experiments have been ordered chronologically according to the date of publication. Median and maximum lifespan estimates were reported in original research papers, or were otherwise estimated from published survival curves. In most cases, the median lifespan estimate is listed in the table (see “Median LS” columns and footnotes). Estimates listed under the “Max LS” columns correspond to one of several metrics, depending upon data reported in the published study (e.g., maximum survival time, average of longest-lived 10%; see footnotes).

| Study                                 | Strain         | Sex  | Sample Size (n) |         | Median LS (Months) |                   | Max LS (Months)     |                   |
|---------------------------------------|----------------|------|-----------------|---------|--------------------|-------------------|---------------------|-------------------|
|                                       |                |      | DR              | Control | DR                 | Control           | DR                  | Control           |
| McCay et al 1935 <sup>1</sup>         | White          | M    | 13              | 14      | 26.6               | 17.4              | 42.8 <sup>d</sup>   | 23.4 <sup>d</sup> |
| McCay et al 1935 <sup>1</sup>         | White          | F    | 23              | 22      | 30.1               | 27.4              | 41.8 <sup>d</sup>   | 35.7 <sup>d</sup> |
| McCay et al 1943 <sup>2</sup>         | White          | M    | 10              | 19      | 36.2 <sup>†</sup>  | 19.8 <sup>†</sup> | 39.7 <sup>b</sup>   | 30.8 <sup>b</sup> |
| McCay et al 1943 <sup>2</sup>         | White          | F    | 10              | 19      | 37.5 <sup>†</sup>  | 24.1 <sup>†</sup> | 41.6 <sup>b</sup>   | 37.0 <sup>b</sup> |
| Carlson and Hoelzel 1946 <sup>3</sup> | Wistar         | M    | 15              | 14      | 22.8 <sup>†</sup>  | 20.4 <sup>†</sup> | 35.2 <sup>a</sup>   | 27.0 <sup>a</sup> |
| Carlson and Hoelzel 1946 <sup>3</sup> | Wistar         | F    | 15              | 19      | 24.4 <sup>†</sup>  | 22.9 <sup>†</sup> | 35.3 <sup>a</sup>   | 33.7 <sup>a</sup> |
| Gilbert et al 1958 <sup>4</sup>       | Wistar         | M    | 13              | 237     | 28.1               | 24.7              | 38.1 <sup>d</sup>   | 32.3 <sup>d</sup> |
| Gilbert et al 1958 <sup>4</sup>       | Wistar         | F    | 14              | 349     | 30.0               | 23.1              | 39.1 <sup>d</sup>   | 30.5 <sup>d</sup> |
| Berg and Simms 1961 <sup>5</sup>      | Sprague-Dawley | M    | 79              | 89      | 33.3               | 25.0              | 38.3 <sup>a</sup>   | 31.7 <sup>a</sup> |
| Berg and Simms 1961 <sup>5</sup>      | Sprague-Dawley | F    | 39              | 79      | > 40.0             | 30.3              | > 40.0 <sup>a</sup> | 38.3 <sup>a</sup> |
| Ross 1961 <sup>6</sup>                | Sprague-Dawley | M    | 210             | 25      | 31.3               | 10.2              | 44.4 <sup>a</sup>   | 11.6 <sup>a</sup> |
| Ross 1961 <sup>6</sup>                | Sprague-Dawley | M    | 120             | 25      | 33.0               | 22.7              | 49.3 <sup>a</sup>   | 27.0 <sup>a</sup> |
| Ross 1961 <sup>6</sup>                | Sprague-Dawley | M    | 210             | 25      | 29.3               | 30.3              | 42.9 <sup>a</sup>   | 41.7 <sup>a</sup> |
| Ross 1961 <sup>6</sup>                | Sprague-Dawley | M    | 195             | 25      | 33.0               | 21.7              | 54.6 <sup>a</sup>   | 29.8 <sup>a</sup> |
| Kibler and Johnson 1966 <sup>7</sup>  | Holzman        | M    | 20              | 40      | 24.3 <sup>†</sup>  | 19.6 <sup>†</sup> | 28.1 <sup>d</sup>   | 23.6 <sup>d</sup> |
| Ross and Bras 1971 <sup>8</sup>       | Chas River     | M, F | 250             | 250     | 29.3               | 18.7              | 52.5 <sup>a</sup>   | 33.1 <sup>a</sup> |
| Leveille 1972 <sup>9</sup>            | Sprague-Dawley | M    | 60              | 60      | 22.9 <sup>†</sup>  | 19.6 <sup>†</sup> | 28.5 <sup>d</sup>   | 24.0 <sup>d</sup> |
| Nolan et al 1972 <sup>10</sup>        | Albino         | M    | 50              | 50      | 30.8 <sup>†</sup>  | 23.5 <sup>†</sup> | ?                   | ?                 |
| Nolan et al 1972 <sup>10</sup>        | Albino         | F    | 50              | 50      | 29.1 <sup>†</sup>  | 25.2 <sup>†</sup> | ?                   | ?                 |
| Ross and Bras 1973 <sup>11</sup>      | Chas River     | M    | 350             | 250     | 28.3               | 18.3              | 41.7 <sup>a</sup>   | 31.7 <sup>a</sup> |
| Ross and Bras 1973 <sup>11</sup>      | Chas River     | M    | 249             | 250     | 28.3               | 18.3              | 48.3 <sup>a</sup>   | 31.7 <sup>a</sup> |
| Ross and Bras 1973 <sup>11</sup>      | Chas River     | M    | 247             | 250     | 31.7               | 21.7              | 51.7 <sup>a</sup>   | 35.0 <sup>a</sup> |
| Drori and Folman 1976 <sup>12</sup>   | Albino         | M    | 49              | 49      | 29.5 <sup>†</sup>  | 24.2 <sup>†</sup> | 38.0 <sup>d</sup>   | 31.7 <sup>d</sup> |
| Merry and Holehan 1979 <sup>13</sup>  | Sprague-Dawley | F    | 45              | 200     | 36.3               | 23.5              | 38.7 <sup>c</sup>   | 26.9 <sup>c</sup> |
| Everitt et al 1980 <sup>14</sup>      | Wistar         | M    | 25              | 25      | 28.6 <sup>†</sup>  | 26.2 <sup>†</sup> | 42.7 <sup>a</sup>   | 37.3 <sup>a</sup> |
| Merry and Holehan 1981 <sup>15</sup>  | Sprague-Dawley | M    | 100             | 497     | 32.9               | 23.1              | 50.0 <sup>a</sup>   | 35.2 <sup>a</sup> |

|                                              |                            |      |     |     |                   |                   |                   |                   |
|----------------------------------------------|----------------------------|------|-----|-----|-------------------|-------------------|-------------------|-------------------|
| Everitt et al 1982 <sup>16</sup>             | Wistar                     | M    | 25  | 25  | 31.2              | 24.3              | 41.7 <sup>a</sup> | 35.0 <sup>a</sup> |
| Yu et al 1982 <sup>17</sup>                  | Fischer 344                | M    | 115 | 115 | 34.9              | 23.8              | 47.8 <sup>a</sup> | 32.1 <sup>a</sup> |
| Goodrick et al 1982 <sup>18</sup>            | Wistar                     | M    | 24  | 28  | 34.7              | 18.7              | 46.1 <sup>a</sup> | 25.3 <sup>a</sup> |
| Zamenhof and van Marthens 1982 <sup>19</sup> | Sprague-Dawley             | M, F | 829 | 969 | 14.2              | 13.2              | 43.0 <sup>a</sup> | 32.0 <sup>a</sup> |
| Everitt et al 1983 <sup>20</sup>             | Wistar                     | M    | 15  | 20  | 30.4 <sup>†</sup> | 25.2 <sup>†</sup> | 39.6 <sup>a</sup> | 36.2 <sup>a</sup> |
| Wyndham et al 1983 <sup>21</sup>             | Wistar                     | M    | 25  | 25  | 29.1 <sup>†</sup> | 24.2 <sup>†</sup> | 42.8 <sup>a</sup> | 35.6 <sup>a</sup> |
| Goodrick et al 1983 <sup>22</sup>            | Wistar                     | M    | 24  | 52  | 31.0 <sup>†</sup> | 25.7 <sup>†</sup> | 38.9 <sup>a</sup> | 32.8 <sup>a</sup> |
| Davis et al 1983 <sup>23</sup>               | Wistar                     | M    | 36  | 36  | 23.9              | 22.0              | ?                 | ?                 |
| Yu et al 1985 <sup>24</sup>                  | Fischer 344                | M    | 40  | 40  | 35.2              | 23.4              | 40.9 <sup>d</sup> | 31.4 <sup>d</sup> |
| Beuchene et al 1986 <sup>25</sup>            | Wistar                     | M    | 45  | 45  | 40.9 <sup>†</sup> | 33.3 <sup>†</sup> | 50.0 <sup>b</sup> | 42.3 <sup>b</sup> |
| Deerberg et al 1990 <sup>26</sup>            | Han:SPRD                   | M    | 96  | 96  | 32.2 <sup>†</sup> | 28.2 <sup>†</sup> | 38.9 <sup>d</sup> | 34.6 <sup>d</sup> |
| Holloszy and Schechtman 1991 <sup>27</sup>   | Long Evans                 | M    | 40  | 45  | 35.2 <sup>†</sup> | 29.2 <sup>†</sup> | 44.1 <sup>b</sup> | 40.0 <sup>b</sup> |
| Shimokawa et al 1993 <sup>28</sup>           | Fischer 344                | M    | 40  | 40  | 36.5              | 27.5              | 42.7 <sup>d</sup> | 30.7 <sup>d</sup> |
| Thurman et al 1994 <sup>29</sup>             | Fischer 344                | M    | 53  | 49  | 31.3              | 25.5              | 37.8 <sup>d</sup> | 30.0 <sup>d</sup> |
| Thurman et al 1994 <sup>29</sup>             | Fischer 344                | F    | 52  | 54  | 33.0              | 28.8              | 39.8 <sup>d</sup> | 35.8 <sup>d</sup> |
| Murtagh-Mark et al 1995 <sup>30</sup>        | Fischer 344                | M    | 42  | 41  | 30.2              | 22.8              | 33.8 <sup>d</sup> | 25.9 <sup>d</sup> |
| Murtagh-Mark et al 1995 <sup>30</sup>        | Fischer 344                | M    | 42  | 41  | 25.0              | 25.4              | 36.5 <sup>d</sup> | 28.5 <sup>d</sup> |
| McCarter et al 1997 <sup>31</sup>            | Fischer 344                | M    | 40  | 40  | 34.1              | 25.6              | 40.2 <sup>d</sup> | 28.7 <sup>d</sup> |
| McCarter et al 1997 <sup>31</sup>            | Fischer 344                | M    | 40  | 40  | 37.4              | 26.7              | 41.2 <sup>d</sup> | 31.5 <sup>d</sup> |
| Fernandes et al 1997 <sup>32</sup>           | Fischer 344 x Brown Norway | F    | 34  | 34  | 46.2              | 34.5              | 56.2 <sup>d</sup> | 41.4 <sup>d</sup> |
| Shimokawa et al 2003 <sup>33</sup>           | Wistar                     | M    | 30  | 30  | 34.5              | 31.75             | 43.0 <sup>d</sup> | 36.5 <sup>d</sup> |
| Vaselli et al 2005 <sup>34</sup>             | Sprague-Dawley             | M    | 22  | 25  | 27.6              | 23.4              | 32.6 <sup>d</sup> | 27.5 <sup>d</sup> |
| Vaselli et al 2005 <sup>34</sup>             | Sprague-Dawley             | F    | 19  | 24  | 25.1              | 20.0              | 29.2 <sup>d</sup> | 27.1 <sup>d</sup> |
| Merry et al 2008 <sup>35</sup>               | BN                         | M    | 75  | 102 | 34.9              | 30.9              | 38.7 <sup>d</sup> | 34.8 <sup>d</sup> |
| Zha et al 2008 <sup>36</sup>                 | Wistar                     | M    | 30  | 30  | 36.0              | 32.0              | 48.5 <sup>a</sup> | 39.5 <sup>a</sup> |
| Smith et al 2010 <sup>37</sup>               | Fischer 344                | M    | 40  | 31  | 28.9 <sup>†</sup> | 26.5 <sup>†</sup> | 35.2 <sup>b</sup> | 34.6 <sup>b</sup> |
| Abalan et al 2010 <sup>38</sup>              | Long Evans                 | M    | 10  | 8   | 38.4              | 26.5              | 46.7 <sup>a</sup> | 35.2 <sup>a</sup> |

<sup>†</sup>The value listed is a mean lifespan rather than median lifespan.

<sup>a</sup>Maximum survival time in the cohort.

<sup>b</sup>Average of the longest 10% of survival times in the cohort.

<sup>c</sup>Age at 25% survival.

<sup>d</sup>Age at 10% survival.

<sup>1</sup>McCay CM, Crowell MF, Maynard LA. 1935. The effect of retarded growth upon the length of life span and upon the ultimate body size. *J Nutr* 10:63.

<sup>2</sup>McCay CM, Sperling G, Barnes LL. 1943. Growth, ageing, chronic diseases and life span in rats. *Arch Biochem Biophys* 2:469.

- <sup>3</sup>Carlson AJ, Hoelzel F. 1946. Apparent prolongation of the life span of rats by intermittent fasting. *J Nutr* 31:363-75.
- <sup>4</sup>Gilbert C, Gillman J, Loustalot P, Lutz W. 1958. The modifying influence of diet and the physical environment of spontaneous tumour frequency in rats. *Br J Cancer* 12:565-93.
- <sup>5</sup>Berg BN, Simms HS. 1961. Nutrition and longevity in the rat. III. Food restriction beyond 800 days. *J Nutr* 74:23-32.
- <sup>6</sup>Ross MH. 1961. Length of life and nutrition in the rat. *J Nutr* 75:197-210.
- <sup>7</sup>Kibler HH, Johnson HD. 1966. Temperature and longevity in male rats. *J Gerontol* 21:52-6.
- <sup>8</sup>Ross MH, Bras G. 1971. Lasting influence of early caloric restriction on prevalence of neoplasms in the rat. *J Natl Cancer Inst* 47:1095-113.
- <sup>9</sup>Leveille GA. 1972. The long-term effects of meal-eating on lipogenesis, enzyme activity, and longevity in the rat. *J Nutr* 102:549-56.
- <sup>10</sup>Nolen GA. 1972. Effect of various restricted dietary regimens on the growth, health and longevity of albino rats. *J Nutr* 102:1477-93.
- <sup>11</sup>Ross MH, Bras G. 1973. Influence of protein under- and overnutrition on spontaneous tumor prevalence in the rat. *J Nutr* 103:944-63.
- <sup>12</sup>Drori D, Folman Y. 1976. Environmental effects on longevity in the male rat: exercise, mating, castration and restricted feeding. *Exp Gerontol* 11:25-32.
- <sup>13</sup>Merry BJ, Holehan AM. 1979. Onset of puberty and duration of fertility in rats fed a restricted diet. *J Reprod Fertil* 57:253-9.
- <sup>14</sup>Everitt AV, Seedsman NJ, Jones F. 1980. The effects of hypophysectomy and continuous food restriction, begun at ages 70 and 400 days, on collagen aging, proteinuria, incidence of pathology and longevity in the male rat. *Mech Ageing Dev* 12:161-72.
- <sup>15</sup>Merry BJ, Holehan AM. 1981. Serum profiles of LH, FSH, testosterone and 5 alpha-DHT from 21 to 1000 days of age in ad libitum fed and dietary restricted rats. *Exp Gerontol* 16:431-44.
- <sup>16</sup>Everitt AV, Porter BD, Wyndham JR. 1982. Effects of caloric intake and dietary composition on the development of proteinuria, age-associated renal disease and longevity in the male rat. *Gerontology* 28:168-75.
- <sup>17</sup>Yu BP, Masoro EJ, Murata I, Bertrand HA, Lynd FT. 1982. Life span study of SPF Fischer 344 male rats fed ad libitum or restricted diets: longevity, growth, lean body mass and disease. *J Gerontol* 37:130-41.
- <sup>18</sup>Goodrick CL, Ingram DK, Reynolds MA, Freeman JR, Cider NL. 1982. Effects of intermittent feeding upon growth and life span in rats. *Gerontology*. 28:233-41.
- <sup>19</sup>Zamenhof S, van Marthens E. 1982. Effects of prenatal and chronic undernutrition on aging and survival in rats. *J Nutr* 112:972-7.
- <sup>20</sup>Everitt AV, Wyndham JR, Barnard DL. 1983. The anti-aging action of hypophysectomy in hypothalamic obese rats: effects on collagen aging, age-associated proteinuria development and renal histopathology. *Mech Ageing Dev* 22:233-51.
- <sup>21</sup>Wyndham JR, Everitt AV, Everitt SF. 1983. Effects of isolation and food restriction begun at 50 days on the development of age-associated renal disease in the male Wistar rat. *Arch Gerontol Geriatr* 2:317-32.
- <sup>22</sup>Goodrick CL, Ingram DK, Reynolds MA, Freeman JR, Cider NL. 1983. Effects of intermittent feeding upon growth, activity, and lifespan in rats allowed voluntary exercise. *Exp Aging Res* 9:203-9.

- <sup>23</sup>Davis TA, Bales CW, Beauchene RE. 1983. Differential effects of dietary caloric and protein restriction in the aging rat. *Exp Gerontol* 18:427-35.
- <sup>24</sup>Yu BP, Masoro EJ, McMahan CA. 1985. Nutritional influences on aging of Fischer 344 rats: I. Physical, metabolic, and longevity characteristics. *J Gerontol* 40:657-70.
- <sup>25</sup>Beauchene RE, Bales CW, Bragg CS, Hawkins ST, Mason RL. 1986. Effect of age of initiation of feed restriction on growth, body composition, and longevity of rats. *J Gerontol* 41:13-9.
- <sup>26</sup>Deerberg F, Rapp KG, Kaspareit-Rittinghausen J, Lörcher K. The effect of food restriction by time-scheduled feeding on the development of body-weight, lifespan and incidence of spontaneous tumours and diseases in male Han:SPRD rats. *Z Versuchstierkd* 33:9-17.
- <sup>27</sup>Holloszy JO, Schechtman KB. 1991. Interaction between exercise and food restriction: effects on longevity of male rats. *J Appl Physiol* 70:1529-35.
- <sup>28</sup>Shimokawa I, Higami Y, Hubbard GB, McMahan CA, Masoro EJ, Yu BP. Diet and the suitability of the male Fischer 344 rat as a model for aging research. *J Gerontol* 48:B27-32
- <sup>29</sup>Thurman JD, Bucci TJ, Hart RW, Turturro A. 1994. Survival, body weight, and spontaneous neoplasms in ad Libitum-fed and food-restricted Fischer-344 rats. *Toxicol Pathol* 22:1-9.
- <sup>30</sup>Murtagh-Mark CM, Reiser KM, Harris R Jr, McDonald RB. 1995. Source of dietary carbohydrate affects life span of Fischer 344 rats independent of caloric restriction. *J Gerontol A Biol Sci Med Sci* 50:B148-54.
- <sup>31</sup>McCarter RJ, Shimokawa I, Ikeno Y, Higami Y, Hubbard GB, Yu BP, McMahan CA. 1997. Physical activity as a factor in the action of dietary restriction on aging: effects in Fischer 344 rats. *Aging (Milano)* 9:73-9.
- <sup>32</sup>Fernandes G, Venkatraman JT, Turturro A, Attwood VG, Hart RW. 1997. Effect of food restriction on life span and immune functions in long-lived Fischer-344 x Brown Norway F1 rats. *J Clin Immunol* 17:85-95.
- <sup>33</sup>Shimokawa I, Higami Y, Tsuchiya T, Otani H, Komatsu T, Chiba T, Yamaza H. 2003. Life span extension by reduction of the growth hormone-insulin-like growth factor-1 axis: relation to caloric restriction. *FASEB J* 17:1108-9.
- <sup>34</sup>Vasselli JR, Weindruch R, Heymsfield SB, Pi-Sunyer FX, Boozer CN, Yi N, Wang C, Pietrobelli A, Allison DB. 2005. Intentional weight loss reduces mortality rate in a rodent model of dietary obesity. *Obes Res* 13:693-702.
- <sup>35</sup>Merry BJ, Kirk AJ, Goyns MH. 2008. Dietary lipoic acid supplementation can mimic or block the effect of dietary restriction on life span. *Mech Ageing Dev* 129:341-8.
- <sup>36</sup>Zha Y, Taguchi T, Nazneen A, Shimokawa I, Higami Y, Razzaque MS. 2008. Genetic suppression of GH-IGF-1 activity, combined with lifelong caloric restriction, prevents age-related renal damage and prolongs the life span in rats. *Am J Nephrol* 28:755-64
- <sup>37</sup>Smith DL Jr, Elam CF Jr, Mattison JA, Lane MA, Roth GS, Ingram DK, Allison DB. 2010. Metformin supplementation and life span in Fischer-344 rats. *J Gerontol A Biol Sci Med Sci* 65:468-74.
- <sup>38</sup>Abalan F, Mayo W, Simon H, Le Moal M. 2010. Paradoxical effect of severe dietary restriction on Long-Evans rat life span. *Int J Vitam Nutr Res* 80:386-93.
