# Supplementary material
Source: PubMed Central journal article supplement (PMC3299887)
Supplement: NIHMS346218-supplement-02.pdf [file NIHMS346218-supplement-02.pdf]

**Supplemental Table 2. Laboratory experiments that have evaluated the effects of dietary restriction protocols on the survival of mice.** The table lists 193 experiments involving a group of DR-fed mice paired with a reference group of mice maintained on a control diet (e.g., *ad lib* feeding). Experiments have been ordered chronologically according to the date of publication. Median and maximum lifespan estimates were reported in original research papers, or were otherwise estimated from published survival curves. In most cases, the median lifespan estimate is listed in the table (see “Median LS” columns and footnotes). Estimates listed under the “Max LS” columns correspond to one of several metrics, depending upon data reported in the published study (e.g., maximum survival time, average of longest-lived 10%; see footnotes).

| Study                                  | Strain  | Sex | Sample Size (n) |         | Median LS (Months) |                   | Max LS (Months)     |                     |
|----------------------------------------|---------|-----|-----------------|---------|--------------------|-------------------|---------------------|---------------------|
|                                        |         |     | DR              | Control | DR                 | Control           | DR                  | Control             |
| Robertson et al 1934 <sup>1</sup>      | White   | F   | 24              | 24      | 27.3               | 25.8              | 33.2 <sup>d</sup>   | 31.4 <sup>d</sup>   |
| Robertson et al 1934 <sup>1</sup>      | White   | M   | 24              | 24      | 24.8               | 23.7              | 31.6 <sup>d</sup>   | 31.4 <sup>d</sup>   |
| Saxton et al 1944 <sup>2</sup>         | AK      | M,F | 94              | 111     | 12.1               | 8.1               | 27.0 <sup>a</sup>   | 17.0 <sup>a</sup>   |
| Ball et al 1947 <sup>3</sup>           | A       | F   | 46              | 72      | 13.4               | 10.5              | 22.1 <sup>d</sup>   | 14.5 <sup>d</sup>   |
| Lee et al. 1956 <sup>4</sup>           | C3H     | M   | 18              | 18      | 27.3               | 15.0              | 34.0 <sup>a</sup>   | 19.0 <sup>a</sup>   |
| Lee et al. 1956 <sup>4</sup>           | C3H     | M   | 18              | 18      | 23.4               | 13.0              | 25.0 <sup>a</sup>   | 17.0 <sup>a</sup>   |
| Silberberg et al 1962 <sup>5</sup>     | A       | M   | 30              | 49      | 11.3               | 16.0              | 24.6 <sup>a</sup>   | 28.7 <sup>a</sup>   |
| Silberberg et al 1962 <sup>6</sup>     | A       | F   | 30              | 35      | 19.1 <sup>†</sup>  | 29.8 <sup>†</sup> | 29.8 <sup>a</sup>   | 28.1 <sup>a</sup>   |
| Silberberg et al 1962 <sup>6</sup>     | B6      | F   | 30              | 29      | 22.0 <sup>†</sup>  | 22.4 <sup>†</sup> | 30.6 <sup>a</sup>   | 32.9 <sup>a</sup>   |
| Gerbase-DeLima et al 1975 <sup>7</sup> | B6      | F   | 100             | 100     | 33.7               | 31.2              | > 40.0 <sup>a</sup> | 38.0 <sup>a</sup>   |
| Leto et al 1976 <sup>8</sup>           | B6      | F   | 70              | 70      | 28.0               | 23.5              | 38.9 <sup>a</sup>   | 28.0 <sup>a</sup>   |
| Fernandes et al 1976a <sup>9</sup>     | NZB     | F   | 22              | 26      | 17.0               | 14.2              | 23.7 <sup>d</sup>   | 21.8 <sup>d</sup>   |
| Fernandes et al 1976a <sup>9</sup>     | NZB     | M   | 27              | 36      | 15.6               | 13.7              | 21.4 <sup>d</sup>   | 21.3 <sup>d</sup>   |
| Fernandes et al 1976b <sup>10</sup>    | C3H     | F   | 18              | 17      | 13.0               | 14.0              | 18.0 <sup>a</sup>   | 16.0 <sup>a</sup>   |
| Fernandes et al 1976c <sup>11</sup>    | (B/W)F1 | F   | 12              | 12      | 18.3               | 10.6              | > 23.3 <sup>a</sup> | 15.1 <sup>a</sup>   |
| Fernandes et al 1976c <sup>11</sup>    | (B/W)F1 | M   | 12              | 12      | > 23.3             | 11.7              | > 23.3 <sup>a</sup> | 15.0 <sup>a</sup>   |
| Fernandes et al 1976c <sup>11</sup>    | (B/W)F1 | F   | 12              | 12      | 16.0               | 10.2              | 19.5 <sup>a</sup>   | 18.2 <sup>a</sup>   |
| Fernandes et al 1976c <sup>11</sup>    | (B/W)F1 | M   | 12              | 12      | > 23.3             | 16.2              | > 23.3 <sup>a</sup> | 21.7 <sup>a</sup>   |
| Fernandes et al 1976c <sup>11</sup>    | (B/W)F1 | F   | 12              | 12      | 15.6               | 10.6              | > 23.3 <sup>a</sup> | 18.8 <sup>a</sup>   |
| Fernandes et al 1976c <sup>11</sup>    | (B/W)F1 | M   | 12              | 12      | 18.6               | 14.7              | > 23.3 <sup>a</sup> | 20.3 <sup>a</sup>   |
| Fernandes et al 1976c <sup>11</sup>    | (B/W)F1 | F   | 12              | 12      | 18.2               | 11.0              | > 23.3 <sup>a</sup> | 19.5 <sup>a</sup>   |
| Fernandes et al 1976c <sup>11</sup>    | (B/W)F1 | M   | 12              | 12      | > 23.3             | 16.3              | > 23.3 <sup>a</sup> | 20.0 <sup>a</sup>   |
| Fernandes et al 1976c <sup>11</sup>    | DBA/2f  | F   | 12              | 12      | 14.3               | 14.5              | 18.7 <sup>a</sup>   | > 21.7 <sup>a</sup> |

|                                          |              |     |     |     |                   |                   |                     |                     |
|------------------------------------------|--------------|-----|-----|-----|-------------------|-------------------|---------------------|---------------------|
| Fernandes et al 1976c <sup>11</sup>      | DBA/2f       | M   | 12  | 12  | 13.9              | 15.5              | 16.6 <sup>a</sup>   | 18.7 <sup>a</sup>   |
| Fernandes et al 1976c <sup>11</sup>      | DBA/2f       | F   | 12  | 12  | 16.6              | 17.4              | 20.0 <sup>a</sup>   | > 21.7 <sup>a</sup> |
| Fernandes et al 1976c <sup>11</sup>      | DBA/2f       | M   | 12  | 12  | 15.9              | 21.7              | > 21.7 <sup>a</sup> | > 21.7 <sup>a</sup> |
| Stoltzner 1977 <sup>12</sup>             | Balb/c       | M   | 188 | 199 | 24.2              | 19.7              | 30.0 <sup>b</sup>   | 28.1 <sup>b</sup>   |
| Fernandes et al 1978 <sup>13</sup>       | kd/kd        | M,F | 9   | 20  | > 16.0            | < 8.0             | > 16.0 <sup>a</sup> | < 8.0 <sup>a</sup>  |
| Goodrick 1978 <sup>14</sup>              | A/J          | M   | 50  | 50  | 22.7 <sup>†</sup> | 21.4 <sup>†</sup> | 31.0 <sup>a</sup>   | 29.0 <sup>a</sup>   |
| Goodrick 1978 <sup>14</sup>              | B6           | M   | 50  | 50  | 24.3 <sup>†</sup> | 21.2 <sup>†</sup> | 36.0 <sup>a</sup>   | 30.0 <sup>a</sup>   |
| Goodrick 1978 <sup>14</sup>              | (A/J x B6)F1 | M   | 50  | 50  | 28.1 <sup>†</sup> | 24.0 <sup>†</sup> | 41.0 <sup>a</sup>   | 33.0 <sup>a</sup>   |
| Tucker 1979 <sup>15</sup>                | Swiss albino | F   | 50  | 50  | 25.7 <sup>†</sup> | 22.1 <sup>†</sup> | 39.1 <sup>a</sup>   | 34.7 <sup>a</sup>   |
| Tucker 1979 <sup>15</sup>                | Swiss albino | M   | 50  | 50  | 24.7 <sup>†</sup> | 22.6 <sup>†</sup> | 37.3 <sup>a</sup>   | 34.1 <sup>a</sup>   |
| Cheney et al 1980 <sup>16</sup>          | B6           | M   | 14  | 15  | 24.0              | 25.8              | 44.6 <sup>a</sup>   | 40.7 <sup>a</sup>   |
| Cheney et al 1980 <sup>16</sup>          | B6           | F   | 21  | 20  | 31.4              | 34.3              | 45.3 <sup>a</sup>   | 31.5 <sup>a</sup>   |
| Cheney et al 1980 <sup>16</sup>          | B6           | F   | 100 | 100 | 30.3 <sup>†</sup> | 30.1 <sup>†</sup> | 46.8 <sup>a</sup>   | 42.5 <sup>a</sup>   |
| Cheney et al 1980 <sup>16</sup>          | B6           | F   | 75  | 75  | 28.3              | 32.0              | 45.5 <sup>a</sup>   | 43.7 <sup>a</sup>   |
| Cheney et al 1980 <sup>16</sup>          | B6           | F   | 76  | 66  | 33.3              | 31.9              | 51.0 <sup>a</sup>   | 45.7 <sup>a</sup>   |
| Weindruch and Walford 1982 <sup>17</sup> | B6           | M   | 29  | 24  | 29.9 <sup>†</sup> | 24.9 <sup>†</sup> | 38.2 <sup>b</sup>   | 31.5 <sup>b</sup>   |
| Cheney et al 1983 <sup>18</sup>          | B10C3F1      | F   | 114 | 114 | 48.3              | 41.2              | 56.1 <sup>a</sup>   | 47.4 <sup>a</sup>   |
| Harrison et al 1984 <sup>19</sup>        | B6           | F   | 38  | 32  | 28.3              | 26.6              | 39.6 <sup>b</sup>   | 32.2 <sup>b</sup>   |
| Rehm et al 1985 <sup>20</sup>            | NMRI         | F   | 150 | 150 | 26.0 <sup>†</sup> | 22.0 <sup>†</sup> | 32.7 <sup>a</sup>   | 26.8 <sup>a</sup>   |
| Rehm et al 1985 <sup>20</sup>            | NMRI         | F   | 150 | 150 | 23.5 <sup>†</sup> | 19.8 <sup>†</sup> | 31.8 <sup>a</sup>   | 26.2 <sup>a</sup>   |
| Rehm et al 1985 <sup>20</sup>            | NMRI         | F   | 150 | 150 | 21.5 <sup>†</sup> | 19.4 <sup>†</sup> | 30.7 <sup>a</sup>   | 26.8 <sup>a</sup>   |
| Weindruch et al 1986 <sup>21</sup>       | (C3B10R)F1   | F   | 60  | 57  | 45.1 <sup>†</sup> | 32.7 <sup>†</sup> | 53.0 <sup>b</sup>   | 39.7 <sup>b</sup>   |
| Nelson and Halberg 1986 <sup>22</sup>    | (CD2)F1      | F   | 278 | 168 | 34.6 <sup>†</sup> | 29.2 <sup>†</sup> | 45.6 <sup>b</sup>   | 37.6 <sup>b</sup>   |
| Harrison and Archer 1987 <sup>23</sup>   | B6           | M   | 48  | 45  | 19.7              | 29.3              | 35.2 <sup>b</sup>   | 36.1 <sup>b</sup>   |
| Harrison and Archer 1987 <sup>23</sup>   | B6CBAF1      | M   | 34  | 35  | 39.7              | 32.8              | 52.9 <sup>b</sup>   | 41.4 <sup>b</sup>   |
| Goodrick et al 1990 <sup>24</sup>        | B6           | M   | 40  | 40  | 31.7 <sup>†</sup> | 25.0 <sup>†</sup> | 38.3 <sup>c</sup>   | 31.1 <sup>c</sup>   |
| Goodrick et al 1990 <sup>24</sup>        | B6           | M   | 30  | 30  | 29.2 <sup>†</sup> | 26.4 <sup>†</sup> | 38.8 <sup>c</sup>   | 34.6 <sup>c</sup>   |
| Goodrick et al 1990 <sup>24</sup>        | B6           | M   | 30  | 30  | 27.0 <sup>†</sup> | 26.9 <sup>†</sup> | 37.6 <sup>c</sup>   | 35.2 <sup>c</sup>   |
| Blackwell et al 1995 <sup>25</sup>       | B6           | M   | 55  | 50  | 31.7              | 27.5              | 41.0 <sup>b</sup>   | 34.8 <sup>b</sup>   |
| Blackwell et al 1995 <sup>25</sup>       | B6           | F   | 56  | 37  | 33.5              | 26.9              | 40.2 <sup>b</sup>   | 34.1 <sup>b</sup>   |
| Sheldon et al 1995 <sup>26</sup>         | B6C3F1       | M   | 56  | 56  | 43.8              | 32.2              | 50.8 <sup>b</sup>   | 41.8 <sup>b</sup>   |
| Sheldon et al 1995 <sup>26</sup>         | B6C3F1       | F   | 55  | 56  | 41.3              | 30.3              | 48.1 <sup>b</sup>   | 36.4 <sup>b</sup>   |

|                                    |               |     |     |     |                   |                   |                   |                   |
|------------------------------------|---------------|-----|-----|-----|-------------------|-------------------|-------------------|-------------------|
| Yoshida et al 1997 <sup>27</sup>   | C3H/HeNirMs   | M   | 135 | 165 | 27.8 <sup>†</sup> | 26.3 <sup>†</sup> | 35.2 <sup>d</sup> | 32.9 <sup>d</sup> |
| Pugh et al 1999 <sup>28</sup>      | B6            | M   | 75  | 75  | 34.6              | 29.8              | 41.8 <sup>b</sup> | 37.8 <sup>b</sup> |
| Bartke et al 2001 <sup>29</sup>    | Heterogeneous | M,F | 26  | 26  | 30.6              | 24.1              | 39.1 <sup>d</sup> | 29.0 <sup>d</sup> |
| Forster et al 2003 <sup>30</sup>   | B6            | M   | 22  | 22  | 32.6              | 26.3              | 42.7 <sup>a</sup> | 34.3 <sup>a</sup> |
| Forster et al 2003 <sup>30</sup>   | B6D2F1        | M   | 22  | 22  | 34.1              | 27.0              | 46.8 <sup>a</sup> | 35.7 <sup>a</sup> |
| Forster et al 2003 <sup>30</sup>   | DBA/2         | M   | 22  | 22  | 23.7              | 25.1              | 33.6 <sup>a</sup> | 36.9 <sup>a</sup> |
| Ikeno et al 2005 <sup>31</sup>     | B6            | M   | 28  | 28  | 36.0              | 30.8              | 41.7 <sup>d</sup> | 34.5 <sup>d</sup> |
| Ikeno et al 2005 <sup>31</sup>     | B6            | M   | 32  | 30  | 37.8              | 31.2              | 45.6 <sup>d</sup> | 35.4 <sup>d</sup> |
| Bonkowski et al 2006 <sup>32</sup> | Heterogeneous | M   | 19  | 19  | 35.4              | 29.8              | 42.4 <sup>a</sup> | 37.1 <sup>a</sup> |
| Bonkowski et al 2006 <sup>32</sup> | Heterogeneous | F   | 19  | 19  | 39.3              | 30.7              | 46.1 <sup>a</sup> | 38.6 <sup>a</sup> |
| Harper et al 2006 <sup>33</sup>    | wild          | M   | 35  | 39  | 29.0 <sup>†</sup> | 29.6 <sup>†</sup> | 53.2 <sup>d</sup> | 43.9 <sup>d</sup> |
| Pearson et al. 2008 <sup>34</sup>  | B6            | M   | 55  | 60  | 30.6 <sup>†</sup> | 29.4 <sup>†</sup> | 35.0 <sup>d</sup> | 34.0 <sup>d</sup> |
| Harper et al 2010 <sup>35</sup>    | (B6×129)F2    | F   | 24  | 24  | 34.8              | 25.8              | 44.9 <sup>d</sup> | 31.1 <sup>d</sup> |
| Flurkey et al 2010 <sup>36</sup>   | UMHET3        | M   | 16  | 14  | 36.7 <sup>†</sup> | 27.7 <sup>†</sup> | 47.3 <sup>b</sup> | 40.6 <sup>b</sup> |
| Flurkey et al 2010 <sup>36</sup>   | UMHET3        | F   | 16  | 16  | 39.0 <sup>†</sup> | 27.9 <sup>†</sup> | 46.1 <sup>b</sup> | 33.8 <sup>b</sup> |
| Flurkey et al 2010 <sup>36</sup>   | CByB6F1       | M   | 16  | 16  | 42.8 <sup>†</sup> | 28.6 <sup>†</sup> | 45.7 <sup>b</sup> | 36.9 <sup>b</sup> |
| Flurkey et al 2010 <sup>36</sup>   | CByB6F1       | F   | 16  | 16  | 42.8 <sup>†</sup> | 28.6 <sup>†</sup> | 51.2 <sup>b</sup> | 39.0 <sup>b</sup> |
| Liao et al 2010 <sup>37</sup>      | ILSXISS 3     | M   | 5   | 5   | 22.0              | 23.3              | 31.4 <sup>a</sup> | 35.5 <sup>a</sup> |
| Liao et al 2010 <sup>37</sup>      | ILSXISS 3     | F   | 5   | 5   | 37.6              | 34.8              | 38.8 <sup>a</sup> | 40.5 <sup>a</sup> |
| Liao et al 2010 <sup>37</sup>      | ILSXISS 7     | M   | 5   | 5   | 32.7              | 34.9              | 39.4 <sup>a</sup> | 37.9 <sup>a</sup> |
| Liao et al 2010 <sup>37</sup>      | ILSXISS 7     | F   | 3   | 5   | 13.1              | 38.1              | 14.0 <sup>a</sup> | 40.3 <sup>a</sup> |
| Liao et al 2010 <sup>37</sup>      | ILSXISS 13    | M   | 5   | 5   | 31.9              | 23.2              | 32.4 <sup>a</sup> | 31.3 <sup>a</sup> |
| Liao et al 2010 <sup>37</sup>      | ILSXISS 13    | F   | 5   | 5   | 31.2              | 28.8              | 32.6 <sup>a</sup> | 31.2 <sup>a</sup> |
| Liao et al 2010 <sup>37</sup>      | ILSXISS 14    | M   | 5   | 5   | 34.7              | 31.5              | 36.7 <sup>a</sup> | 34.4 <sup>a</sup> |
| Liao et al 2010 <sup>37</sup>      | ILSXISS 16    | F   | 5   | 5   | 21.0              | 22.9              | 28.5 <sup>a</sup> | 30.1 <sup>a</sup> |
| Liao et al 2010 <sup>37</sup>      | ILSXISS 19    | M   | 4   | 5   | 14.4              | 32.7              | 20.3 <sup>a</sup> | 34.9 <sup>a</sup> |
| Liao et al 2010 <sup>37</sup>      | ILSXISS 19    | F   | 5   | 5   | 22.0              | 31.3              | 34.2 <sup>a</sup> | 33.5 <sup>a</sup> |
| Liao et al 2010 <sup>37</sup>      | ILSXISS 22    | M   | 4   | 5   | 34.6              | 38.9              | 35.1 <sup>a</sup> | 40.6 <sup>a</sup> |
| Liao et al 2010 <sup>37</sup>      | ILSXISS 23b   | M   | 9   | 11  | 32.6              | 35.4              | 34.5 <sup>a</sup> | 40.3 <sup>a</sup> |
| Liao et al 2010 <sup>37</sup>      | ILSXISS 23b   | F   | 14  | 15  | 20.7              | 33.0              | 30.3 <sup>a</sup> | 38.4 <sup>a</sup> |
| Liao et al 2010 <sup>37</sup>      | ILSXISS 24    | M   | 5   | 5   | 16.5              | 27.6              | 31.6 <sup>a</sup> | 31.3 <sup>a</sup> |
| Liao et al 2010 <sup>37</sup>      | ILSXISS 24    | F   | 5   | 5   | 18.7              | 34.1              | 21.5 <sup>a</sup> | 40.5 <sup>a</sup> |

|                               |            |   |   |   |      |      |                   |                   |
|-------------------------------|------------|---|---|---|------|------|-------------------|-------------------|
| Liao et al 2010 <sup>37</sup> | ILSXISS 25 | M | 5 | 5 | 35.7 | 32.6 | 36.2 <sup>a</sup> | 35.6 <sup>a</sup> |
| Liao et al 2010 <sup>37</sup> | ILSXISS 25 | F | 3 | 5 | 10.8 | 32.6 | 16.9 <sup>a</sup> | 34.9 <sup>a</sup> |
| Liao et al 2010 <sup>37</sup> | ILSXISS 26 | M | 5 | 5 | 29.0 | 34.8 | 33.7 <sup>a</sup> | 35.5 <sup>a</sup> |
| Liao et al 2010 <sup>37</sup> | ILSXISS 26 | F | 5 | 5 | 34.0 | 35.0 | 37.5 <sup>a</sup> | 35.7 <sup>a</sup> |
| Liao et al 2010 <sup>37</sup> | ILSXISS 28 | F | 4 | 5 | 23.7 | 23.9 | 29.6 <sup>a</sup> | 27.5 <sup>a</sup> |
| Liao et al 2010 <sup>37</sup> | ILSXISS 41 | M | 5 | 5 | 21.8 | 26.2 | 23.6 <sup>a</sup> | 28.3 <sup>a</sup> |
| Liao et al 2010 <sup>37</sup> | ILSXISS 41 | F | 5 | 5 | 22.1 | 32.9 | 29.8 <sup>a</sup> | 33.4 <sup>a</sup> |
| Liao et al 2010 <sup>37</sup> | ILSXISS 46 | F | 5 | 5 | 41.2 | 38.2 | 41.5 <sup>a</sup> | 38.7 <sup>a</sup> |
| Liao et al 2010 <sup>37</sup> | ILSXISS 48 | M | 5 | 5 | 30.5 | 25.0 | 33.2 <sup>a</sup> | 32.0 <sup>a</sup> |
| Liao et al 2010 <sup>37</sup> | ILSXISS 48 | F | 5 | 5 | 31.3 | 29.9 | 35.9 <sup>a</sup> | 37.9 <sup>a</sup> |
| Liao et al 2010 <sup>37</sup> | ILSXISS 49 | M | 5 | 4 | 30.0 | 29.7 | 33.8 <sup>a</sup> | 34.2 <sup>a</sup> |
| Liao et al 2010 <sup>37</sup> | ILSXISS 49 | F | 5 | 5 | 35.2 | 23.7 | 39.8 <sup>a</sup> | 26.4 <sup>a</sup> |
| Liao et al 2010 <sup>37</sup> | ILSXISS 50 | M | 5 | 5 | 14.3 | 15.3 | 19.5 <sup>a</sup> | 22.4 <sup>a</sup> |
| Liao et al 2010 <sup>37</sup> | ILSXISS 50 | F | 5 | 5 | 30.7 | 9.7  | 31.5 <sup>a</sup> | 25.9 <sup>a</sup> |
| Liao et al 2010 <sup>37</sup> | ILSXISS 51 | M | 5 | 5 | 36.7 | 33.9 | 38.3 <sup>a</sup> | 36.9 <sup>a</sup> |
| Liao et al 2010 <sup>37</sup> | ILSXISS 51 | F | 5 | 5 | 39.9 | 27.3 | 40.7 <sup>a</sup> | 34.3 <sup>a</sup> |
| Liao et al 2010 <sup>37</sup> | ILSXISS 52 | M | 4 | 5 | 21.2 | 23.8 | 22.2 <sup>a</sup> | 27.2 <sup>a</sup> |
| Liao et al 2010 <sup>37</sup> | ILSXISS 56 | M | 5 | 5 | 40.6 | 42.6 | 43.2 <sup>a</sup> | 43.4 <sup>a</sup> |
| Liao et al 2010 <sup>37</sup> | ILSXISS 56 | F | 5 | 5 | 34.9 | 38.2 | 37.7 <sup>a</sup> | 41.8 <sup>a</sup> |
| Liao et al 2010 <sup>37</sup> | ILSXISS 60 | F | 4 | 5 | 39.2 | 35.8 | 40.1 <sup>a</sup> | 38.6 <sup>a</sup> |
| Liao et al 2010 <sup>37</sup> | ILSXISS 62 | M | 5 | 5 | 14.4 | 35.2 | 22.4 <sup>a</sup> | 37.7 <sup>a</sup> |
| Liao et al 2010 <sup>37</sup> | ILSXISS 66 | M | 5 | 5 | 27.9 | 22.8 | 39.2 <sup>a</sup> | 29.6 <sup>a</sup> |
| Liao et al 2010 <sup>37</sup> | ILSXISS 66 | F | 5 | 5 | 28.0 | 24.8 | 32.2 <sup>a</sup> | 29.4 <sup>a</sup> |
| Liao et al 2010 <sup>37</sup> | ILSXISS 79 | M | 3 | 5 | 35.5 | 36.5 | 35.5 <sup>a</sup> | 40.5 <sup>a</sup> |
| Liao et al 2010 <sup>37</sup> | ILSXISS 80 | M | 5 | 5 | 30.1 | 26.8 | 31.1 <sup>a</sup> | 31.0 <sup>a</sup> |
| Liao et al 2010 <sup>37</sup> | ILSXISS 80 | F | 5 | 5 | 30.2 | 29.6 | 35.0 <sup>a</sup> | 33.4 <sup>a</sup> |
| Liao et al 2010 <sup>37</sup> | ILSXISS 84 | M | 5 | 5 | 31.0 | 30.0 | 33.4 <sup>a</sup> | 32.4 <sup>a</sup> |
| Liao et al 2010 <sup>37</sup> | ILSXISS 84 | F | 5 | 5 | 11.0 | 27.0 | 16.6 <sup>a</sup> | 31.8 <sup>a</sup> |
| Liao et al 2010 <sup>37</sup> | ILSXISS 86 | M | 3 | 5 | 6.5  | 37.0 | 11.1 <sup>a</sup> | 38.1 <sup>a</sup> |
| Liao et al 2010 <sup>37</sup> | ILSXISS 86 | F | 5 | 4 | 28.6 | 30.9 | 29.6 <sup>a</sup> | 38.5 <sup>a</sup> |
| Liao et al 2010 <sup>37</sup> | ILSXISS 89 | M | 5 | 5 | 41.7 | 31.7 | 42.7 <sup>a</sup> | 35.4 <sup>a</sup> |
| Liao et al 2010 <sup>37</sup> | ILSXISS 89 | F | 5 | 5 | 33.2 | 29.6 | 40.3 <sup>a</sup> | 30.1 <sup>a</sup> |

|                               |             |   |   |   |      |      |                   |                   |
|-------------------------------|-------------|---|---|---|------|------|-------------------|-------------------|
| Liao et al 2010 <sup>37</sup> | ILSXISS 90  | M | 5 | 5 | 27.5 | 27.6 | 29.7 <sup>a</sup> | 30.4 <sup>a</sup> |
| Liao et al 2010 <sup>37</sup> | ILSXISS 90  | F | 5 | 5 | 35.4 | 30.2 | 36.2 <sup>a</sup> | 32.5 <sup>a</sup> |
| Liao et al 2010 <sup>37</sup> | ILSXISS 92  | M | 5 | 5 | 36.7 | 33.1 | 38.4 <sup>a</sup> | 39.0 <sup>a</sup> |
| Liao et al 2010 <sup>37</sup> | ILSXISS 92  | F | 5 | 5 | 35.3 | 26.6 | 36.7 <sup>a</sup> | 35.3 <sup>a</sup> |
| Liao et al 2010 <sup>37</sup> | ILSXISS 94  | M | 5 | 5 | 23.0 | 23.9 | 26.0 <sup>a</sup> | 36.5 <sup>a</sup> |
| Liao et al 2010 <sup>37</sup> | ILSXISS 94  | F | 5 | 5 | 32.5 | 23.3 | 35.2 <sup>a</sup> | 28.8 <sup>a</sup> |
| Liao et al 2010 <sup>37</sup> | ILSXISS 97  | M | 3 | 5 | 14.1 | 33.0 | 16.5 <sup>a</sup> | 33.2 <sup>a</sup> |
| Liao et al 2010 <sup>37</sup> | ILSXISS 97  | F | 5 | 5 | 14.7 | 33.3 | 20.3 <sup>a</sup> | 35.2 <sup>a</sup> |
| Liao et al 2010 <sup>37</sup> | ILSXISS 98  | M | 5 | 5 | 21.2 | 39.6 | 30.6 <sup>a</sup> | 43.6 <sup>a</sup> |
| Liao et al 2010 <sup>37</sup> | ILSXISS 98  | F | 5 | 5 | 20.1 | 41.6 | 27.5 <sup>a</sup> | 44.6 <sup>a</sup> |
| Liao et al 2010 <sup>37</sup> | ILSXISS 99  | M | 5 | 5 | 28.8 | 31.0 | 33.8 <sup>a</sup> | 34.9 <sup>a</sup> |
| Liao et al 2010 <sup>37</sup> | ILSXISS 99  | F | 5 | 5 | 19.4 | 29.6 | 25.1 <sup>a</sup> | 33.7 <sup>a</sup> |
| Liao et al 2010 <sup>37</sup> | ILSXISS 100 | M | 3 | 5 | 28.3 | 29.8 | 29.8 <sup>a</sup> | 31.2 <sup>a</sup> |
| Liao et al 2010 <sup>37</sup> | ILSXISS 100 | F | 3 | 5 | 32.5 | 30.8 | 33.8 <sup>a</sup> | 30.9 <sup>a</sup> |
| Liao et al 2010 <sup>37</sup> | ILSXISS 103 | M | 5 | 5 | 34.3 | 27.4 | 37.7 <sup>a</sup> | 35.4 <sup>a</sup> |
| Liao et al 2010 <sup>37</sup> | ILSXISS 103 | F | 2 | 5 | 36.9 | 28.5 | 37.4 <sup>a</sup> | 32.7 <sup>a</sup> |
| Liao et al 2010 <sup>37</sup> | ILSXISS 107 | M | 5 | 5 | 19.9 | 36.0 | 21.9 <sup>a</sup> | 39.4 <sup>a</sup> |
| Liao et al 2010 <sup>37</sup> | ILSXISS 107 | F | 5 | 5 | 22.5 | 19.9 | 25.2 <sup>a</sup> | 35.1 <sup>a</sup> |
| Liao et al 2010 <sup>37</sup> | ILSXISS 110 | M | 5 | 5 | 36.5 | 19.6 | 40.1 <sup>a</sup> | 31.2 <sup>a</sup> |
| Liao et al 2010 <sup>37</sup> | ILSXISS 110 | F | 5 | 5 | 29.3 | 28.4 | 39.9 <sup>a</sup> | 33.4 <sup>a</sup> |
| Liao et al 2010 <sup>37</sup> | ILSXISS 112 | M | 4 | 4 | 33.4 | 31.6 | 37.5 <sup>a</sup> | 39.4 <sup>a</sup> |
| Liao et al 2010 <sup>37</sup> | ILSXISS 112 | F | 5 | 5 | 25.9 | 20.0 | 40.7 <sup>a</sup> | 27.6 <sup>a</sup> |
| Liao et al 2010 <sup>37</sup> | ILSXISS 114 | M | 2 | 5 | 22.3 | 33.8 | 26.4 <sup>a</sup> | 34.8 <sup>a</sup> |
| Liao et al 2010 <sup>37</sup> | ILSXISS 114 | F | 4 | 5 | 12.1 | 30.4 | 14.9 <sup>a</sup> | 35.3 <sup>a</sup> |
| Liao et al 2010 <sup>37</sup> | ILSXISS 115 | M | 4 | 5 | 9.4  | 33.1 | 13.6 <sup>a</sup> | 36.3 <sup>a</sup> |
| Liao et al 2010 <sup>37</sup> | ILSXISS 115 | F | 2 | 5 | 3.8  | 24.9 | 4.9 <sup>a</sup>  | 30.8 <sup>a</sup> |
| Liao et al 2010 <sup>37</sup> | ILSXISS 117 | M | 5 | 5 | 23.2 | 29.8 | 25.4 <sup>a</sup> | 36.4 <sup>a</sup> |
| Liao et al 2010 <sup>37</sup> | ILSXISS 117 | F | 2 | 5 | 33.4 | 21.4 | 35.9 <sup>a</sup> | 27.5 <sup>a</sup> |
| Liao et al 2010 <sup>37</sup> | ILSXISS 122 | M | 5 | 5 | 28.0 | 28.6 | 29.8 <sup>a</sup> | 32.0 <sup>a</sup> |
| Liao et al 2010 <sup>37</sup> | ILSXISS 122 | F | 3 | 5 | 8.8  | 33.7 | 15.2 <sup>a</sup> | 38.5 <sup>a</sup> |
| Liao et al 2010 <sup>37</sup> | ILSXISS 123 | M | 5 | 5 | 32.8 | 30.5 | 34.8 <sup>a</sup> | 35.0 <sup>a</sup> |
| Liao et al 2010 <sup>37</sup> | ILSXISS 123 | F | 5 | 5 | 36.4 | 32.1 | 39.9 <sup>a</sup> | 33.7 <sup>a</sup> |

|                                |            |   |    |    |      |      |                   |                   |
|--------------------------------|------------|---|----|----|------|------|-------------------|-------------------|
| Rikke et al 2010 <sup>38</sup> | ILSXISS 3  | F | 12 | 10 | 33.9 | 32.1 | 38.3 <sup>a</sup> | 40.0 <sup>a</sup> |
| Rikke et al 2010 <sup>38</sup> | ILSXISS 5  | F | 12 | 10 | 33.9 | 12.7 | 38.6 <sup>a</sup> | 28.7 <sup>a</sup> |
| Rikke et al 2010 <sup>38</sup> | ILSXISS 7  | F | 9  | 10 | 17.9 | 31.6 | 30.1 <sup>a</sup> | 32.8 <sup>a</sup> |
| Rikke et al 2010 <sup>38</sup> | ILSXISS 13 | F | 12 | 9  | 18.7 | 28.2 | 26.0 <sup>a</sup> | 29.2 <sup>a</sup> |
| Rikke et al 2010 <sup>38</sup> | ILSXISS 14 | F | 10 | 10 | 14.9 | 27.5 | 25.2 <sup>a</sup> | 31.3 <sup>a</sup> |
| Rikke et al 2010 <sup>38</sup> | ILSXISS 16 | F | 12 | 10 | 25.2 | 24.0 | 26.7 <sup>a</sup> | 27.4 <sup>a</sup> |
| Rikke et al 2010 <sup>38</sup> | ILSXISS 19 | F | 12 | 9  | 25.5 | 27.6 | 31.9 <sup>a</sup> | 31.1 <sup>a</sup> |
| Rikke et al 2010 <sup>38</sup> | ILSXISS 22 | F | 11 | 10 | 25.8 | 25.4 | 31.7 <sup>a</sup> | 30.5 <sup>a</sup> |
| Rikke et al 2010 <sup>38</sup> | ILSXISS 23 | F | 10 | 7  | 37.2 | 29.4 | 39.0 <sup>a</sup> | 35.1 <sup>a</sup> |
| Rikke et al 2010 <sup>38</sup> | ILSXISS 28 | F | 12 | 10 | 18.4 | 20.0 | 21.0 <sup>a</sup> | 24.4 <sup>a</sup> |
| Rikke et al 2010 <sup>38</sup> | ILSXISS 36 | F | 10 | 10 | 21.7 | 23.3 | 28.1 <sup>a</sup> | 29.0 <sup>a</sup> |
| Rikke et al 2010 <sup>38</sup> | ILSXISS 41 | F | 12 | 10 | 33.1 | 28.5 | 35.3 <sup>a</sup> | 31.8 <sup>a</sup> |
| Rikke et al 2010 <sup>38</sup> | ILSXISS 46 | F | 12 | 10 | 34.2 | 30.8 | 37.8 <sup>a</sup> | 32.8 <sup>a</sup> |
| Rikke et al 2010 <sup>38</sup> | ILSXISS 48 | F | 12 | 10 | 21.8 | 27.6 | 31.9 <sup>a</sup> | 29.5 <sup>a</sup> |
| Rikke et al 2010 <sup>38</sup> | ILSXISS 49 | F | 11 | 10 | 24.5 | 21.1 | 30.8 <sup>a</sup> | 21.3 <sup>a</sup> |
| Rikke et al 2010 <sup>38</sup> | ILSXISS 51 | F | 12 | 5  | 34.0 | 27.8 | 37.0 <sup>a</sup> | 29.8 <sup>a</sup> |
| Rikke et al 2010 <sup>38</sup> | ILSXISS 52 | F | 12 | 10 | 20.0 | 20.5 | 23.7 <sup>a</sup> | 24.7 <sup>a</sup> |
| Rikke et al 2010 <sup>38</sup> | ILSXISS 55 | F | 6  | 10 | 22.8 | 16.3 | 24.8 <sup>a</sup> | 24.0 <sup>a</sup> |
| Rikke et al 2010 <sup>38</sup> | ILSXISS 62 | F | 12 | 10 | 32.6 | 35.0 | 41.6 <sup>a</sup> | 41.5 <sup>a</sup> |
| Rikke et al 2010 <sup>38</sup> | ILSXISS 66 | F | 11 | 10 | 12.7 | 18.4 | 36.1 <sup>a</sup> | 31.9 <sup>a</sup> |
| Rikke et al 2010 <sup>38</sup> | ILSXISS 70 | F | 12 | 7  | 22.3 | 23.5 | 34.9 <sup>a</sup> | 32.4 <sup>a</sup> |
| Rikke et al 2010 <sup>38</sup> | ILSXISS 73 | F | 12 | 10 | 27.7 | 25.0 | 34.3 <sup>a</sup> | 31.6 <sup>a</sup> |
| Rikke et al 2010 <sup>38</sup> | ILSXISS 75 | F | 12 | 10 | 28.6 | 22.0 | 32.8 <sup>a</sup> | 30.7 <sup>a</sup> |
| Rikke et al 2010 <sup>38</sup> | ILSXISS 76 | F | 11 | 10 | 23.4 | 27.0 | 26.6 <sup>a</sup> | 29.8 <sup>a</sup> |
| Rikke et al 2010 <sup>38</sup> | ILSXISS 86 | F | 12 | 10 | 16.8 | 32.0 | 23.9 <sup>a</sup> | 34.4 <sup>a</sup> |
| Rikke et al 2010 <sup>38</sup> | ILSXISS 88 | F | 12 | 10 | 30.4 | 32.0 | 33.5 <sup>a</sup> | 35.9 <sup>a</sup> |
| Rikke et al 2010 <sup>38</sup> | ILSXISS 89 | F | 9  | 9  | 34.9 | 21.9 | 37.8 <sup>a</sup> | 31.0 <sup>a</sup> |
| Rikke et al 2010 <sup>38</sup> | ILSXISS 90 | F | 12 | 10 | 24.1 | 28.0 | 29.0 <sup>a</sup> | 31.3 <sup>a</sup> |
| Rikke et al 2010 <sup>38</sup> | ILSXISS 92 | F | 11 | 10 | 31.5 | 28.6 | 37.0 <sup>a</sup> | 35.0 <sup>a</sup> |
| Rikke et al 2010 <sup>38</sup> | ILSXISS 94 | F | 12 | 10 | 29.5 | 27.5 | 34.9 <sup>a</sup> | 33.9 <sup>a</sup> |
| Rikke et al 2010 <sup>38</sup> | ILSXISS 97 | F | 9  | 9  | 28.4 | 27.4 | 35.9 <sup>a</sup> | 32.7 <sup>a</sup> |
| Rikke et al 2010 <sup>38</sup> | ILSXISS 99 | F | 12 | 9  | 7.7  | 29.7 | 23.8 <sup>a</sup> | 33.2 <sup>a</sup> |

|                                |             |   |    |    |      |      |                   |                   |
|--------------------------------|-------------|---|----|----|------|------|-------------------|-------------------|
| Rikke et al 2010 <sup>38</sup> | ILSXISS 100 | F | 12 | 10 | 28.4 | 29.0 | 32.1 <sup>a</sup> | 32.3 <sup>a</sup> |
| Rikke et al 2010 <sup>38</sup> | ILSXISS 102 | F | 12 | 8  | 26.5 | 27.2 | 30.0 <sup>a</sup> | 30.5 <sup>a</sup> |
| Rikke et al 2010 <sup>38</sup> | ILSXISS 103 | F | 12 | 10 | 29.2 | 22.7 | 33.9 <sup>a</sup> | 28.6 <sup>a</sup> |
| Rikke et al 2010 <sup>38</sup> | ILSXISS 107 | F | 11 | 10 | 28.1 | 29.1 | 32.0 <sup>a</sup> | 39.1 <sup>a</sup> |
| Rikke et al 2010 <sup>38</sup> | ILSXISS 110 | F | 12 | 10 | 30.2 | 31.8 | 37.3 <sup>a</sup> | 33.7 <sup>a</sup> |
| Rikke et al 2010 <sup>38</sup> | ILSXISS 114 | F | 12 | 9  | 21.9 | 24.5 | 25.2 <sup>a</sup> | 30.8 <sup>a</sup> |
| Rikke et al 2010 <sup>38</sup> | ILSXISS 115 | F | 8  | 9  | 39.0 | 22.6 | 43.7 <sup>a</sup> | 27.8 <sup>a</sup> |
| Rikke et al 2010 <sup>38</sup> | ILSXISS 117 | F | 12 | 10 | 18.1 | 27.0 | 27.4 <sup>a</sup> | 34.8 <sup>a</sup> |
| Rikke et al 2010 <sup>38</sup> | ILSXISS 122 | F | 12 | 10 | 33.8 | 30.9 | 41.0 <sup>a</sup> | 34.5 <sup>a</sup> |
| Rikke et al 2010 <sup>38</sup> | ILSXISS 123 | F | 12 | 10 | 28.5 | 25.8 | 33.6 <sup>a</sup> | 29.3 <sup>a</sup> |

<sup>†</sup>The value listed is a mean lifespan rather than median lifespan.

<sup>a</sup>Maximum survival time in the cohort.

<sup>b</sup>Average of the longest 10% of survival times in the cohort.

<sup>c</sup>Average of the longest 20% of survival times in the cohort.

<sup>d</sup>Age at 10% survival

<sup>1</sup>Robertson TB, Marston HR, Walters JW. 1934. The influence of intermittent starvation and of intermittent starvation plus nucleic acid on the growth and longevity of the white mouse. *Aust J Exp Biol Med Sci* 12:33.

<sup>2</sup>Saxton JA, Boon MC, Furth J. 1944. *Cancer Res.* 4:401-409.

<sup>3</sup>Ball ZB, Barnes RH, Visscher MB. 1947. The effects of dietary caloric restriction on maturity and senescence, with particular reference to fertility and longevity. *Am J Physiol* 150:511-9.

<sup>4</sup>Lee YC, Visscher MB, King JT. 1956. Life span and causes of death in inbred mice in relation to diet. *J Gerontol* 11:364-71.

<sup>5</sup>Silberberg R, Silberberg M, Jarrett SR. 1962. Effects of diet during growth. *Studies in male mice of various strains. Pathol Microbiol (Basel)* 25:56-66

<sup>6</sup>Silberberg R, Jarrett SR, Silberberg M. 1962. Longevity of female mice kept on various dietary regimens during growth. *J Gerontol* 17:239-44.

<sup>7</sup>Gerbace-DeLima M, Liu RK, Cheney KE, Mickey R, Walford RL. 1975. Immune function and survival in a long-lived mouse strain subjected to undernutrition. *Gerontologia* 21:184-202.

<sup>8</sup>Leto S, Kokkonen GC, Barrows CH Jr. 1976. Dietary protein, life-span, and biochemical variables in female mice. *J Gerontol* 31:144-8.

<sup>9</sup>Fernandes G, Yunis EJ, Good RA. 1976. Influence of protein restriction on immune functions in NZB mice. *J Immunol* 116:782-90.

<sup>10</sup>Fernandes G, Yunis EJ, Good RA. 1976. Suppression of adenocarcinoma by the immunological consequences of calorie restriction. *Nature* 263:504-7.

<sup>11</sup>Fernandes G, Yunis EJ, Good RA. 1976. Influence of diet on survival of mice. *Proc Natl Acad Sci USA* 73:1279-83.

- <sup>12</sup>Stoltzner G. 1977. Effects of life-long dietary protein restriction on mortality, growth, organ weights, blood counts, liver aldolase and kidney catalase in Balb/C mice. *Growth* 41:337-48.
- <sup>13</sup>Fernandes G, Yunis EJ, Miranda M, Smith J, Good RA. 1978. Nutritional inhibition of genetically determined renal disease and autoimmunity with prolongation of life in kdkd mice. *Proc Natl Acad Sci USA* 75:2888-92.
- <sup>14</sup>Goodrick CL. 1978. Body weight increment and length of life: the effect of genetic constitution and dietary protein. *J Gerontol* 33:184-90.
- <sup>15</sup>Tucker MJ. 1979. The effect of long-term food restriction on tumours in rodents. *Int J Cancer* 23:803-7.
- <sup>16</sup>Cheney KE, Liu RK, Smith GS, Leung RE, Mickey MR, Walford RL. 1980. Survival and disease patterns in C57BL/6J mice subjected to undernutrition. *Exp Gerontol* 15:237-58.
- <sup>17</sup>Weindruch R, Walford RL. 1982. Dietary restriction in mice beginning at 1 year of age: effect on life-span and spontaneous cancer incidence. *Science* 215:1415-8.
- <sup>18</sup>Cheney KE, Liu RK, Smith GS, Meredith PJ, Mickey MR, Walford RL. 1983. The effect of dietary restriction of varying duration on survival, tumor patterns, immune function, and body temperature in B10C3F1 female mice. *J Gerontol* 38:420-30.
- <sup>19</sup>Harrison DE, Archer JR, Astle CM. 1984. Effects of food restriction on aging: separation of food intake and adiposity. *Proc Natl Acad Sci U S A* 81:1835-8.
- <sup>20</sup>Rehm S, Rapp KG, Deerberg F. 1985. Influence of food restriction and body fat on life span and tumour incidence in female outbred Han:NMRI mice and two sublines. *Z Versuchstierkd* 27: 249.
- <sup>21</sup>Weindruch R, Walford RL, Fligiel S, Guthrie D. 1986. The retardation of aging in mice by dietary restriction: longevity, cancer, immunity and lifetime energy intake. *J Nutr* 116:641-54.
- <sup>22</sup>Nelson JF, Halberg F. 1986. Meal-timing, circadian rhythms and life span in mice. *J Nutr* 116: 2244.
- <sup>23</sup>Harrison DE, Archer JR. 1987. Genetic differences in effects of food restriction on aging in mice. *J Nutr* 117:376-82.
- <sup>24</sup>Goodrick CL, Ingram DK, Reynolds MA, Freeman JR, Cider N. 1990. Effects of intermittent feeding upon body weight and lifespan in inbred mice: interaction of genotype and age. *Mech Ageing Dev* 55:69-87.
- <sup>25</sup>Blackwell BN, Bucci TJ, Hart RW, Turturro A. 1995. Longevity, body weight, and neoplasia in ad libitum-fed and diet-restricted C57BL6 mice fed NIH-31 open formula diet. *Toxicol Pathol* 23:570-82.
- <sup>26</sup>Sheldon WG, Bucci TJ, Hart RW, Turturro A. 1995. Age-related neoplasia in a lifetime study of ad libitum-fed and food-restricted B6C3F1 mice. *Toxicol Pathol* 23: 458-76.
- <sup>27</sup>Yoshida K, Inoue T, Nojima K, Hirabayashi Y, Sado T. 1997. Calorie restriction reduces the incidence of myeloid leukemia induced by a single whole-body radiation in C3H/He mice. *Proc Natl Acad Sci USA* 94:2615-9.
- <sup>28</sup>Pugh TD, Oberley TD, Weindruch R. 1999. Dietary intervention at middle age: caloric restriction but not dehydroepiandrosterone sulfate increases lifespan and lifetime cancer incidence in mice. *Cancer Res* 59:1642-8.
- <sup>29</sup>Bartke A, Wright JC, Mattison JA, Ingram DK, Miller RA, Roth GS. 2001. Extending the lifespan of long-lived mice. *Nature* 414:412.



- <sup>30</sup>Forster MJ, Morris P, Sohal RS. 2003. Genotype and age influence the effect of caloric intake on mortality in mice. *FASEB J* 17:690-2
- <sup>31</sup>Ikeno Y, Hubbard GB, Lee S, Richardson A, Strong R, Diaz V, Nelson JF. 2005. Housing density does not influence the longevity effect of calorie restriction. *J Gerontol A Biol Sci Med Sci* 60:1510-7.
- <sup>32</sup>Bonkowski MS, Rocha JS, Masternak MM, Al Regaiey KA, Bartke A. 2006. Targeted disruption of growth hormone receptor interferes with the beneficial actions of calorie restriction. *Proc Natl Acad Sci USA* 103:7901-5.
- <sup>33</sup>Harper JM, Leathers CW, Austad SN. 2006. Does caloric restriction extend life in wild mice? *Aging Cell* 5:441-9.
- <sup>34</sup>Pearson KJ, Baur JA, Lewis KN, Peshkin L, Price NL, Labinskyy N, Swindell WR, Kamara D, Minor RK, Perez E, Jamieson HA, Zhang Y, Dunn SR, Sharma K, Pleshko N, Woollett LA, Csiszar A, Ikeno Y, Le Couteur D, Elliott PJ, Becker KG, Navas P, Ingram DK, Wolf NS, Ungvari Z, Sinclair DA, de Cabo R. 2008. Resveratrol delays age-related deterioration and mimics transcriptional aspects of dietary restriction without extending life span. *Cell Metab* 8:157-68.
- <sup>35</sup>Harper JM, Wilkinson JE, Miller RA. 2010. Macrophage migration inhibitory factor-knockout mice are long lived and respond to caloric restriction. *FASEB J* 24:2436-42.
- <sup>36</sup>Flurkey K, Astle CM, Harrison DE. 2010. Life extension by diet restriction and N-acetyl-L-cysteine in genetically heterogeneous mice. *J Gerontol A Biol Sci Med Sci* 65:1275-84.
- <sup>37</sup>Liao CY, Rikke BA, Johnson TE, Diaz V, Nelson JF. 2010. Genetic variation in the murine lifespan response to dietary restriction: from life extension to life shortening. *Aging Cell* 9:92-5
- <sup>38</sup>Rikke BA, Liao CY, McQueen MB, Nelson JF, Johnson TE. 2010. Genetic dissection of dietary restriction in mice supports the metabolic efficiency model of life extension. *Exp Gerontol* 45:691-701
