# Supplementary material
Source: PubMed Central journal article supplement (PMC3299887)
Supplement: NIHMS346218-supplement-5.pdf [file NIHMS346218-supplement-5.pdf]

1341 (dark grey region). The percentage of strains with a larger survival estimate in the AL condition  
1342 (i.e., below-diagonal points) is indicated in the lower right (light grey region). In one case,  
1343 survival estimates were significantly more likely to be lower under the DR condition in  
1344 comparison to the AL condition (see Figure 8K;  $P = 0.02$ ; sign test with  $n = 42$  strains).

1345

1346 **Supplemental Table 1. Summary survivorship statistics for rat laboratory experiments**  
1347 **comparing DR-fed to control-fed cohorts (1935 – present).** This table lists summary statistics  
1348 and references for rat survivorship experiments considered in Figures 1 – 3.

1349

1350 **Supplemental Table 2. Summary survivorship statistics for mouse laboratory experiments**  
1351 **comparing DR-fed to control-fed cohorts (1934 – present).** This table lists summary statistics  
1352 and references for rat survivorship experiments considered in Figures 1, 2, 3 and 6.

1353

1354 **Supplemental Table 3. Summary survivorship statistics for 26 experiments that have**  
1355 **evaluated the effects of DR in C57BL/6 mice (1961 – present).** This table lists summary  
1356 statistics and references for each experiment in which C57BL/6 mice have been evaluated. Most  
1357 experiments included in this table are also included in Supplemental Table 2. Details on DR  
1358 protocols followed in each experiment are provided as footnotes.

1359

1360 **Supplemental Table 4. Summary survivorship statistics for 11 experiments that have**  
1361 **evaluated the effects of DR in DBA/2 mice (1962 – present).** This table lists summary statistics  
1362 and references for each experiment in which DBA/2 mice have been evaluated. Most

1363 experiments included in this table are also included in Supplemental Table 2. Details on DR  
1364 protocols followed in each experiment are provided as footnotes.

Accepted Manuscript
